# Supplementary material for: Preventing long-term disability in CIDP: the role of timely diagnosis and treatment monitoring in a multicenter CIDP cohort
Source: PubMed Central journal article supplement (PMC11377626; doi:10.1007/s00415-024-12548-1), 2024-07-11
Supplement: 415_2024_12548_MOESM1_ESM.pdf [file 415_2024_12548_MOESM1_ESM.pdf]

**A**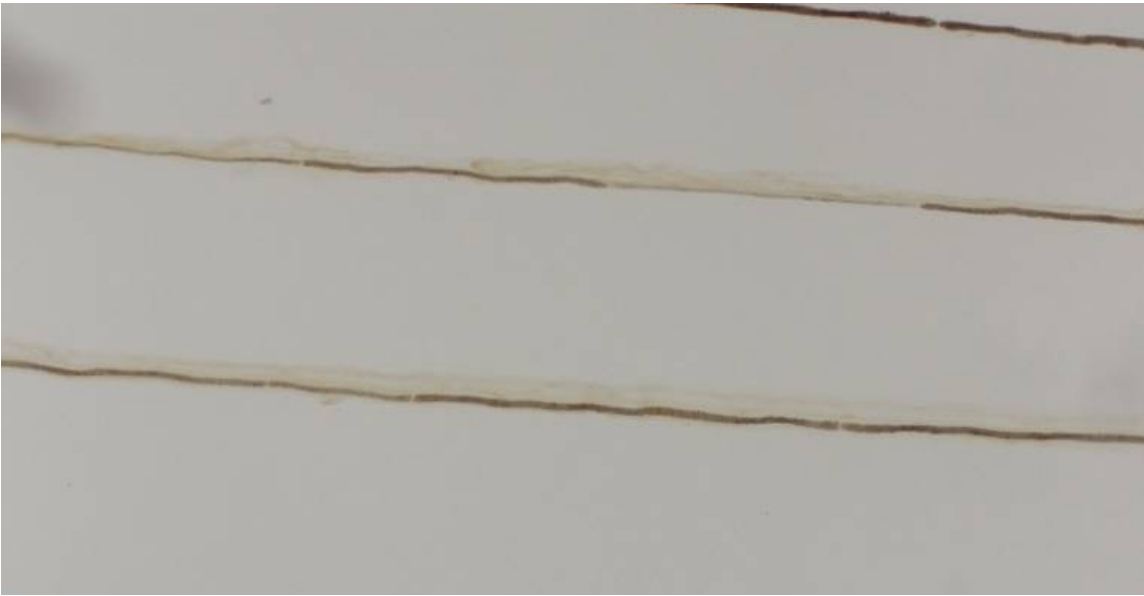**B**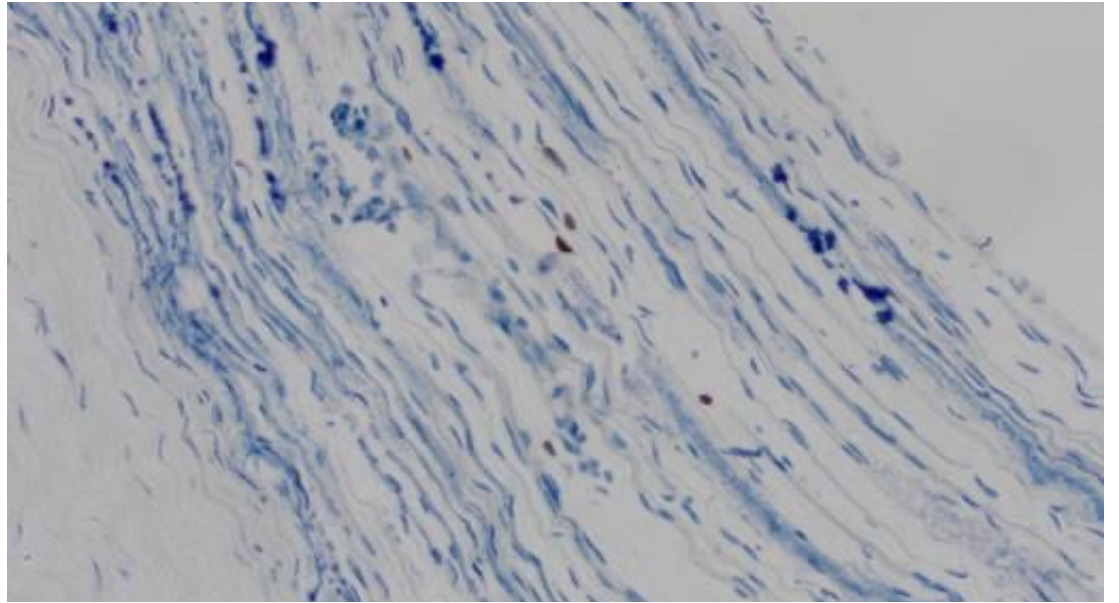**C**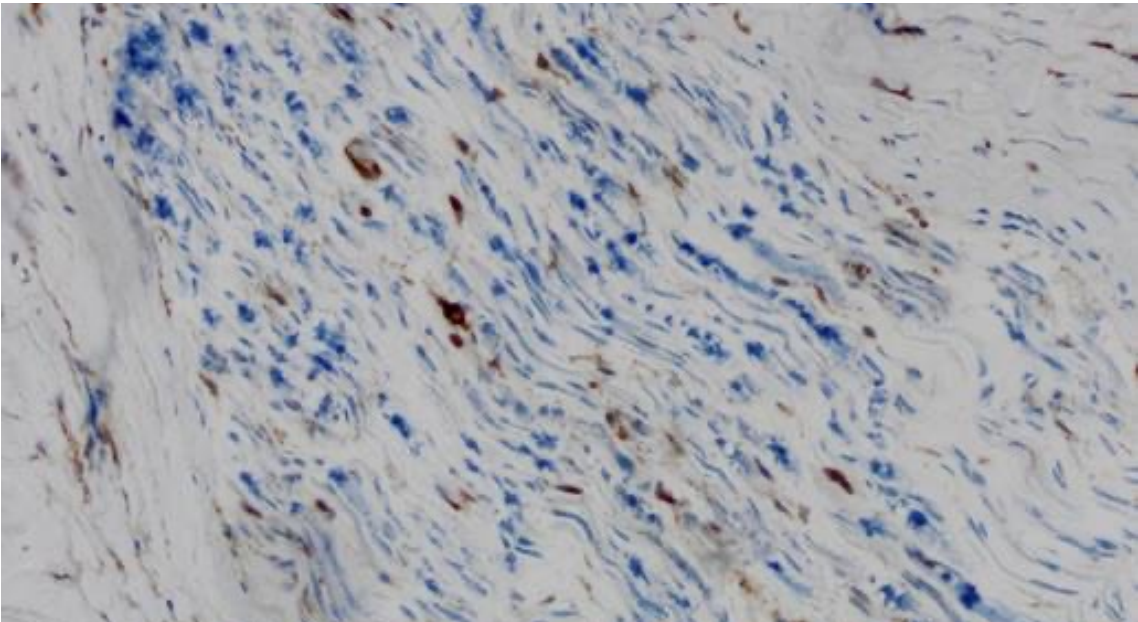**D**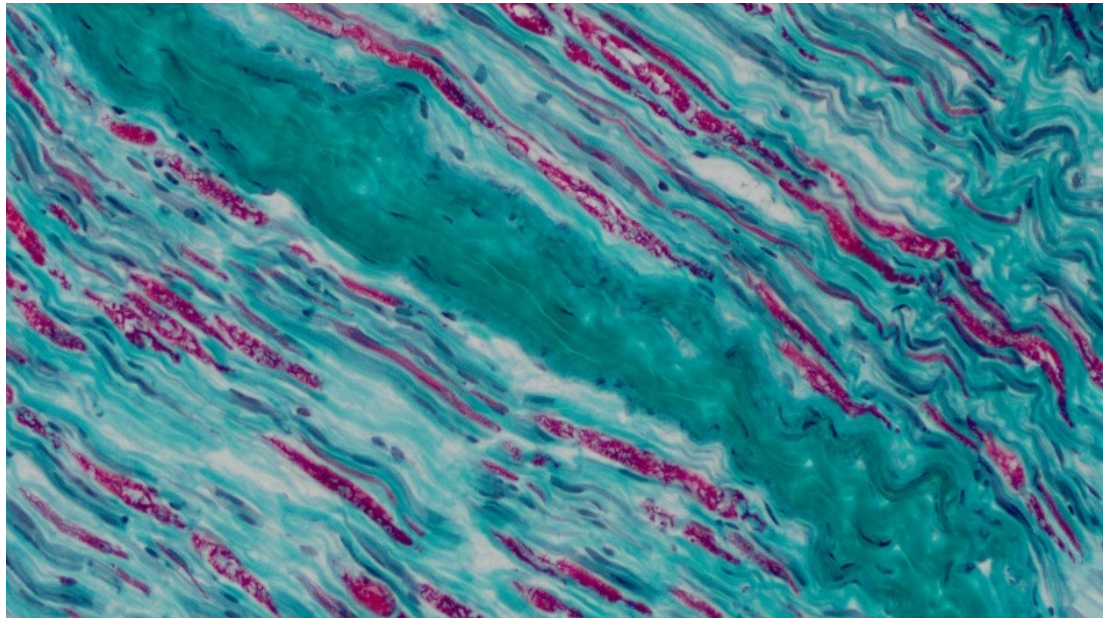

| <i>Comorbidity</i>                                 | <i>n</i> | <i>%</i> |
|----------------------------------------------------|----------|----------|
| <i>Other neuropathies</i>                          | 7        | 4        |
| Guillain-Barré syndrome                            | 7        |          |
| <i>Autoimmune diseases</i>                         | 26       | 13       |
| Hypothyroidism                                     | 14       |          |
| Rheumatoid arthritis                               | 3        |          |
| <i>Cardiovascular diseases</i>                     | 104      | 54       |
| Arterial hypertension                              | 87       |          |
| Coronary heart disease                             | 19       |          |
| Atrial fibrillation                                | 17       |          |
| <i>Pulmonary diseases</i>                          | 28       | 15       |
| Chronic obstructive pulmonary disease              | 9        |          |
| Sleep apnea                                        | 8        |          |
| Bronchial asthma                                   | 5        |          |
| <i>Neurological diseases</i>                       | 40       | 21       |
| Stroke                                             | 9        |          |
| Restless legs syndrome                             | 3        |          |
| Parkinson's disease                                | 3        |          |
| <i>Psychiatric diseases</i>                        | 27       | 14       |
| Depression                                         | 22       |          |
| Anxiety disorder                                   | 3        |          |
| <i>Malignancies</i>                                | 36       | 19       |
| Monoclonal gammopathy of undetermined significance | 21       |          |
| Prostate cancer                                    | 5        |          |
| Multiple myeloma                                   | 3        |          |
| Colon cancer                                       | 3        |          |
| <i>Ophthalmological diseases</i>                   | 15       | 8        |
| Cataract                                           | 11       |          |
| Glaucoma                                           | 3        |          |
| <i>Metabolic diseases</i>                          | 61       | 32       |
| Diabetes mellitus type 2                           | 43       |          |
| Hypercholesterolemia                               | 19       |          |
| Obesity                                            | 6        |          |
| <i>Gastroenterological diseases</i>                | 20       | 10       |
| Diverticulitis                                     | 5        |          |
| Steatosis hepatis                                  | 4        |          |
| Gastritis                                          | 3        |          |
| <i>Renal diseases</i>                              | 20       | 10       |
| Chronic renal failure                              | 13       |          |
| Diabetic nephropathy                               | 2        |          |
| <i>Infectious diseases</i>                         | 8        | 4        |
| Lyme disease                                       | 4        |          |
| Human immunodeficiency virus                       | 3        |          |
| Urinary tract infection                            | 2        |          |
| <i>Other diseases</i>                              | 49       | 25       |
| Disc prolapse                                      | 11       |          |
| Prostatic hyperplasia                              | 5        |          |
| Arthrosis                                          | 4        |          |

**Supplementary Table 1 Prevalence of comorbidities among typical CIDP patients**

Individual comorbidities of CIDP patients. Results are shown as total values (n) or absolute frequencies (%).

*Abbreviations: CIDP, chronic inflammatory demyelinating polyneuropathy.*

| Characteristic                                                | Immunoglobulins | Prednisolone |
|---------------------------------------------------------------|-----------------|--------------|
| <b>Total</b>                                                  | <b>105</b>      | <b>72</b>    |
| <b>Sex (n (%))</b>                                            |                 |              |
| Male                                                          | 78 (74)         | 45 (63)      |
| Female                                                        | 27 (26)         | 27 (37)      |
| <b>Age (mean ± SEM)</b>                                       |                 |              |
| Age at study begin (years)                                    | 62 ± 2          | 62 ± 2       |
| Age at first manifestation (years)                            | 58 ± 1          | 57 ± 1       |
| Age at diagnosis (years)                                      | 59 ± 1          | 59 ± 2       |
| Time between manifestation and diagnosis (months)             | 17 ± 3          | 21 ± 4       |
| <b>Type of consultation (n (%))</b>                           |                 |              |
| Outpatient                                                    | 56 (53)         | 42 (58)      |
| In-patient                                                    | 30 (29)         | 22 (31)      |
| <b>Clinical scores (mean ± SEM)</b>                           |                 |              |
| INCAT arm disability score at diagnosis                       | 0.9 ± 0.1       | 0.6 ± 0.1    |
| INCAT leg disability score at diagnosis                       | 2 ± 0.1         | 1.3 ± 0.01   |
| MRC sum score at diagnosis                                    | 53.5 ± 0.9      | 56.1 ± 0.6   |
| <b>Therapy</b>                                                |                 |              |
| Time to first treatment from diagnosis in months (mean ± SEM) | 4.4 ± 0.8       | 4.7 ± 1.4    |
| SOC-responder (n (%))                                         | 67 (64)         | 39 (54)      |
| SOC-refractory (n (%))                                        | 36 (35)         | 33 (46)      |
| Switch to second therapy (n (%))                              | 43 (41)         | 63 (88)      |

**Supplementary Table 2 Baseline data of first therapies of typical CIDP patients**

Baseline data of typical CIDP patients receiving immunoglobulins as first therapy versus prednisolone. Results are shown as total values (n) with absolute frequencies (%) or mean ± SEM.

*Abbreviations: CIDP, chronic inflammatory demyelinating polyneuropathy; INCAT, Inflammatory Neuropathy Cause and Treatment; MRC, Medical Research Council; SEM, standard error of the mean; SOC, standard of care*
